# Supplementary material for: Detection of target collagen peptides with single amino acid mutation using two fluorescent peptide probes
Source: Royal Society of Chemistry journal article supplement (doi:10.1039/c9tb00610a), 2019-01-01
Supplement: c9tb00610a1.pdf [file c9tb00610a1.pdf]

### Supporting information

Detection of target collagen peptides with single amino acid mutation using two fluorescent peptide probes

Xiuxia Sun, Linyan Yao, Caihong Fu, Liting Luo, Jie Wang, Jianxi Xiao

**Table S1.** Design of the probe and target host-guest peptides.

| Type           | Amino Acid Sequence                       | Function   |
|----------------|-------------------------------------------|------------|
| P <sup>1</sup> | FAM-G(POG) <sub>10</sub>                  | Probe      |
| P <sup>2</sup> | FAM-G(PRGPOG) <sub>5</sub>                |            |
| G              | G(POG) <sub>4</sub> POG(POG) <sub>5</sub> | Host-guest |
| A              | G(POG) <sub>4</sub> POA(POG) <sub>5</sub> |            |
| S              | G(POG) <sub>4</sub> POS(POG) <sub>5</sub> |            |
| R              | G(POG) <sub>4</sub> POR(POG) <sub>5</sub> |            |

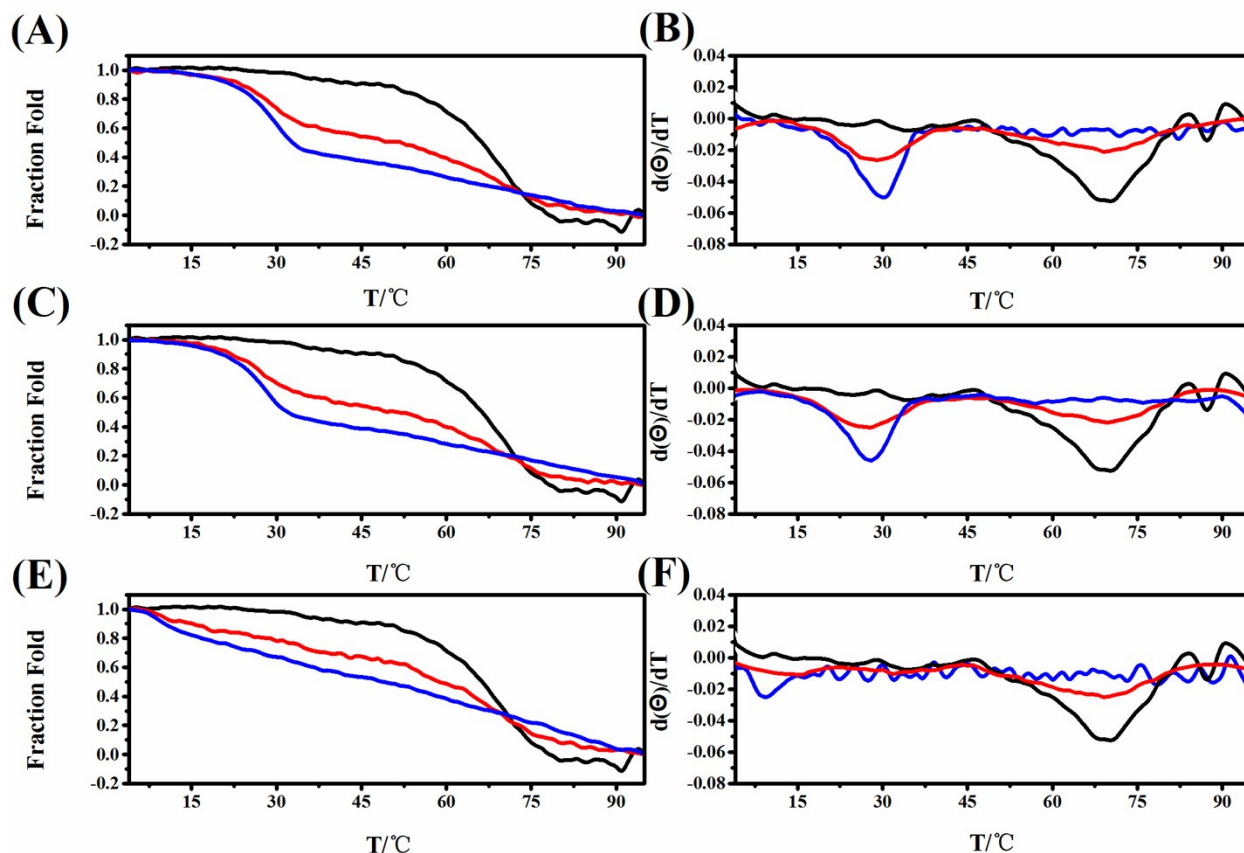

**Figure S1.** CD characterization of the mixtures of the probe peptide P<sup>1</sup> hybridized with various mutation peptides. CD thermal transitions (A) and the first derivative ( $d(\text{MRE})/dT$ ) (B) of the thermal transition curves of homotrimer P<sup>1</sup> (black), homotrimer A (blue) and the 1P<sup>1</sup>:2A mixture (red). CD thermal transitions (C) and the first derivative ( $d(\text{MRE})/dT$ ) (D) of the thermal transition curves of homotrimer P<sup>1</sup> (black), homotrimer S (blue) and the 1P<sup>1</sup>:2S mixture (red). CD thermal transitions (E) and the first derivative ( $d(\text{MRE})/dT$ ) (F) of the thermal transition curves of homotrimer P<sup>1</sup> (black), homotrimer R (blue) and the 1P<sup>1</sup>:2R mixture (red). The mixtures of peptide P<sup>1</sup> and each mutation peptide at a molar ratio of 1:2 (300  $\mu\text{M}$ :600  $\mu\text{M}$ ) were prepared in 20 mM PBS buffer, pH 7.4, heated at 90 °C for 20 min, and then incubated at 4 °C for >24 hrs to drive the formation of heterotrimer. Solutions of each peptide alone were treated in a similar manner to produce homotrimers. Melting transitions were monitored by CD spectroscopy at 225 nm.

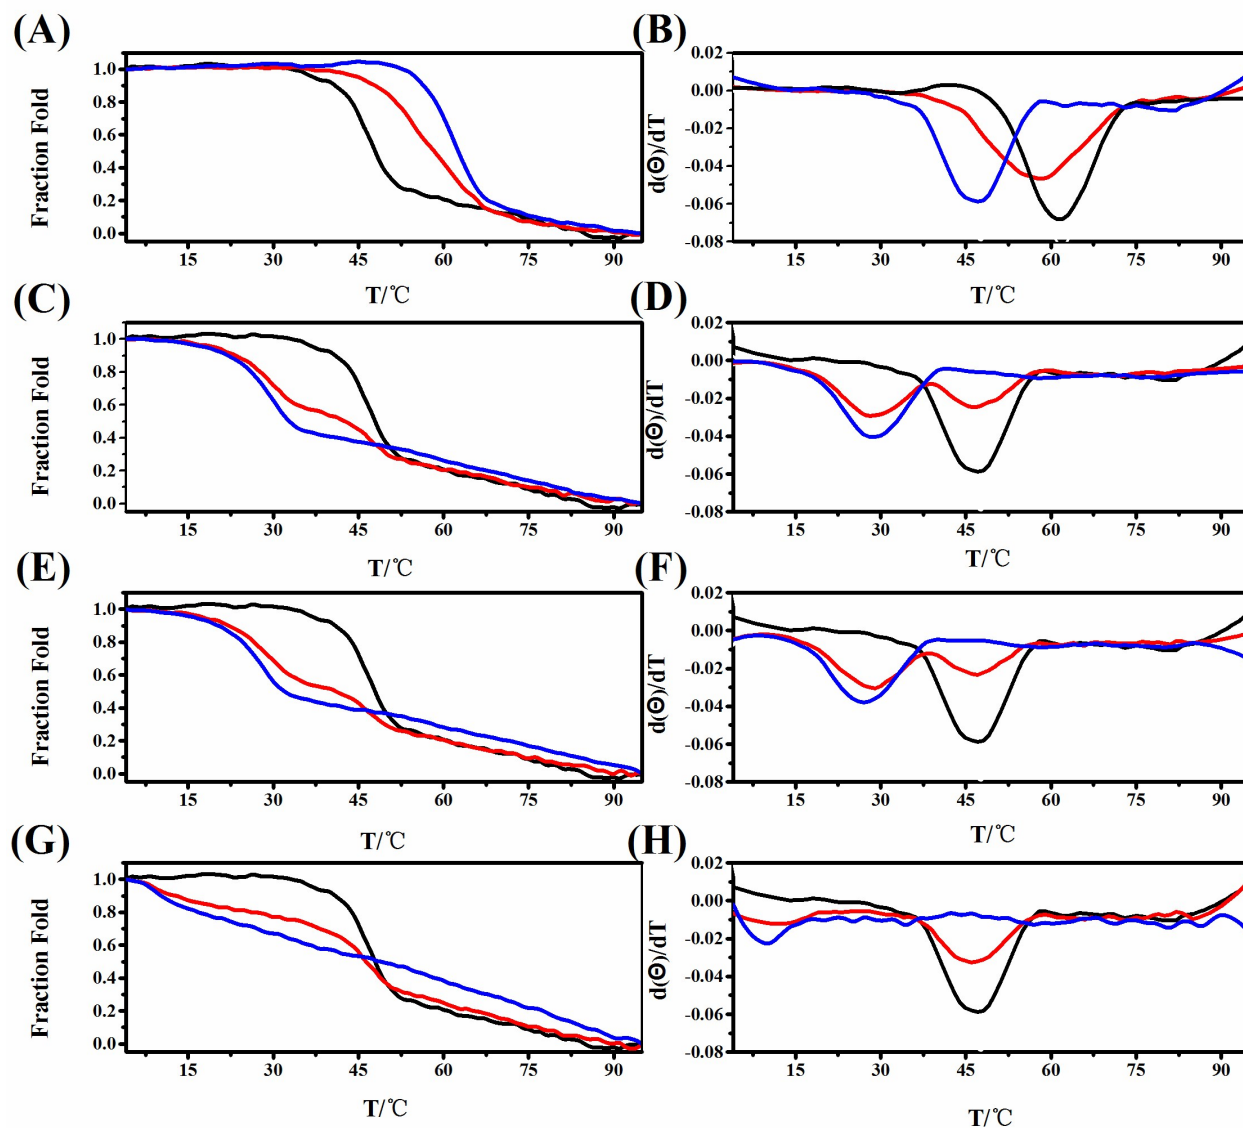

**Figure S2.** CD characterization of the mixtures of the probe peptide P<sup>2</sup> hybridized with the target peptides. CD thermal transitions (A) and the first derivative (d(MRE)/dT) (B) of the thermal transition curves of homotrimer P<sup>2</sup> (black), homotrimer G (blue) and the 1P<sup>2</sup>:2G mixture (red). CD thermal transitions (C) and the first derivative (d(MRE)/dT) (D) of the thermal transition curves of homotrimer P<sup>2</sup> (black), homotrimer A (blue) and the 1P<sup>2</sup>:2A mixture (red). CD thermal transitions (E) and the first derivative (d(MRE)/dT) (F) of the thermal transition curves of homotrimer P<sup>2</sup> (black), homotrimer S (blue) and the 1P<sup>2</sup>:2Smixture (red). CD thermal transitions (G) and the first derivative (d(MRE)/dT) (H) of the thermal transition curves of homotrimer P<sup>2</sup> (black), homotrimer R (blue) and the 1P<sup>2</sup>:2R mixture (red). The mixtures of peptide P<sup>2</sup> and each target peptide at a molar ratio of 1:2 (300

$\mu\text{M}$ :600  $\mu\text{M}$ ) were prepared in 20 mM PBS buffer, pH 7.4, heated at 90 °C for 20 min, and then incubated at 4 °C for >24 hrs to drive the formation of heterotrimer. Solutions of each peptide alone were treated in a similar manner to produce homotrimers. Melting transitions were monitored by CD spectroscopy at 225 nm.
